# Supplementary figures and images for: Selective photo-deposition of Cu onto the surface of monodisperse oleic acid capped TiO2nanorods probed by FT-IR CO-adsorption studies
Source: Royal Society of Chemistry journal article supplement (doi:10.1039/b512113b), 2005-11-28

**Fig. S1**

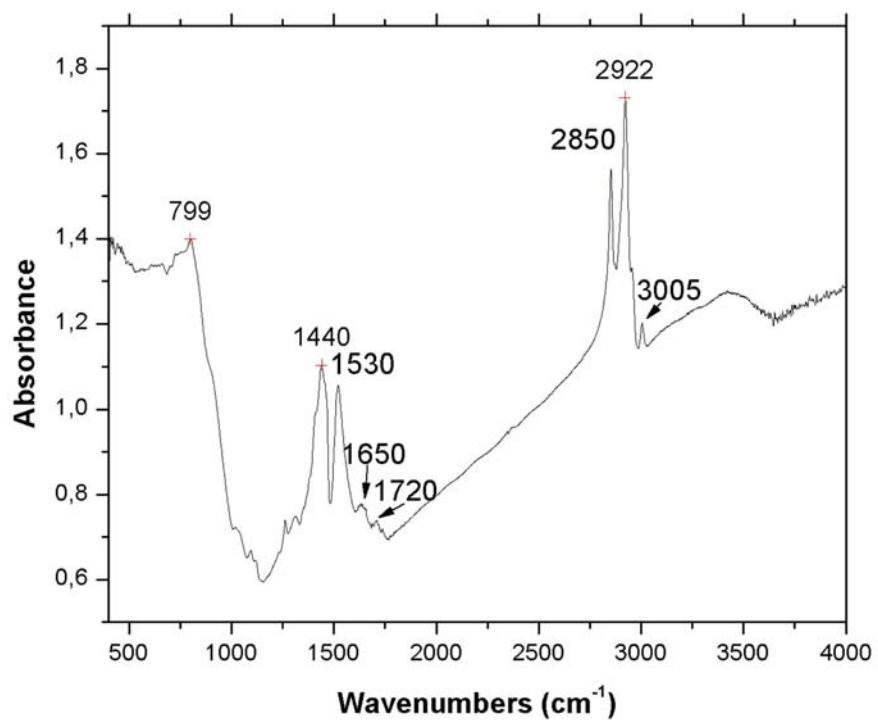

**Fig. S2**

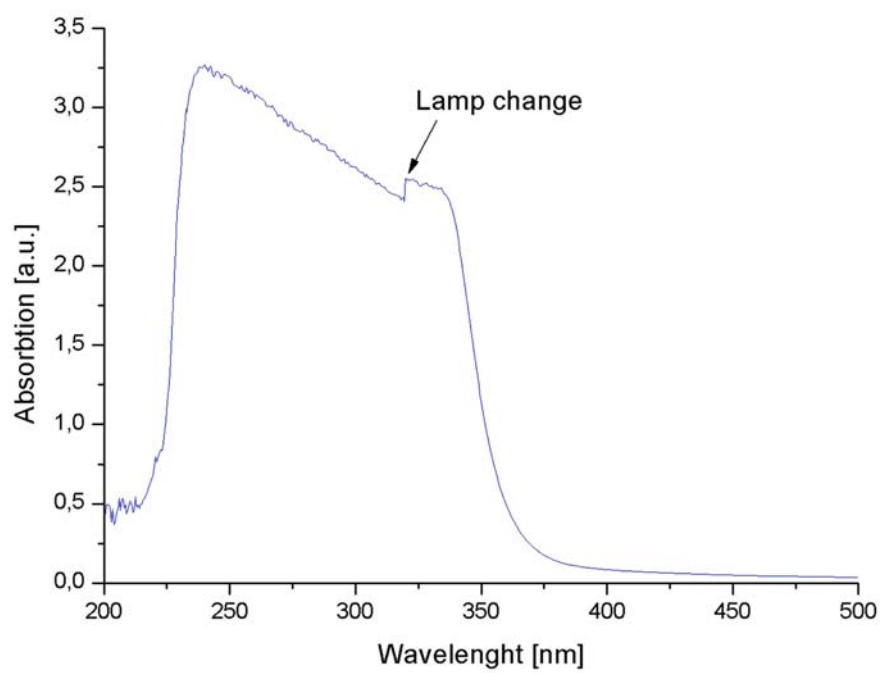

**Fig. S3**

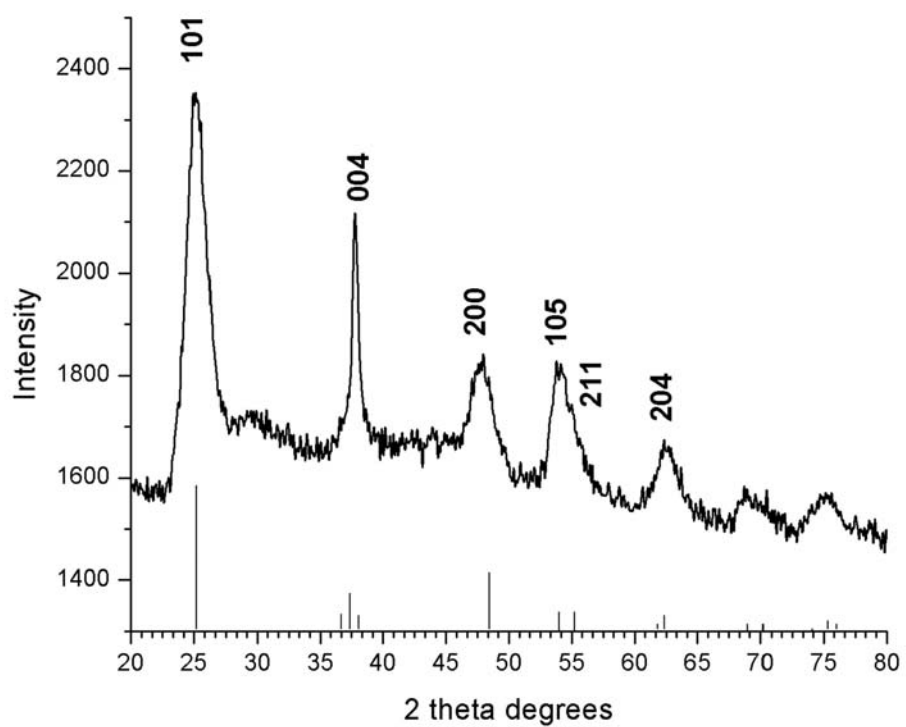

**Fig. S4**

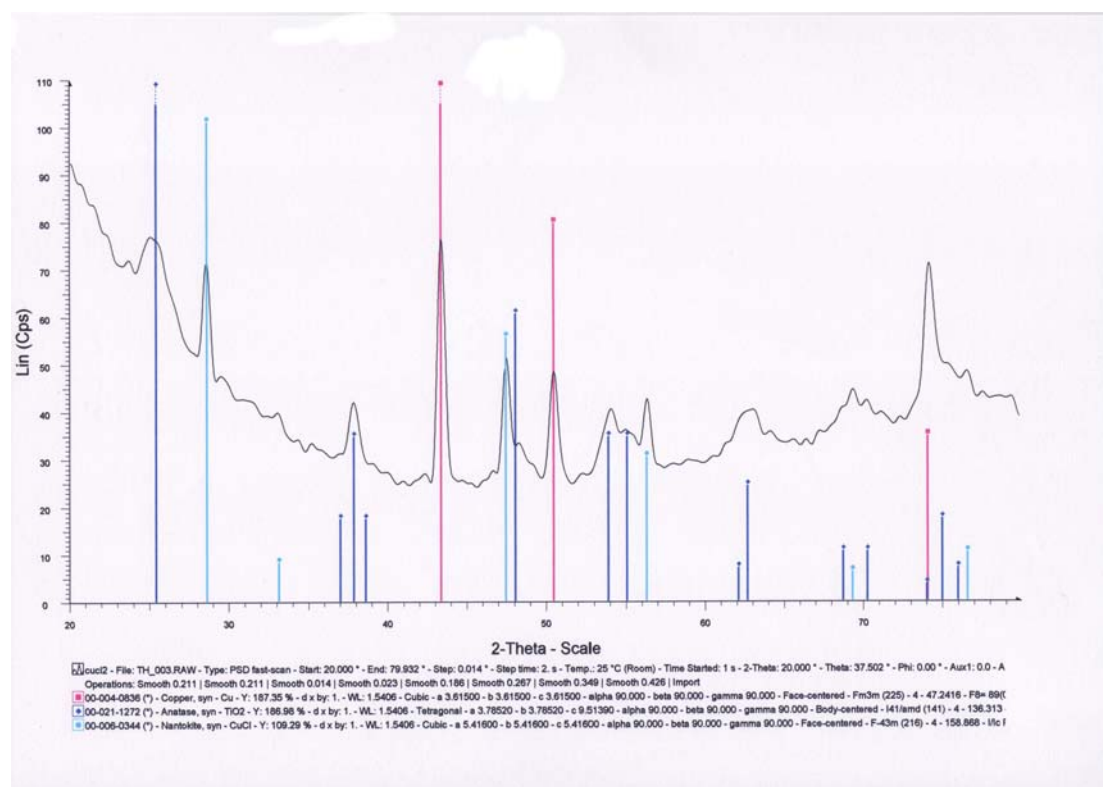

**Fig. S5**

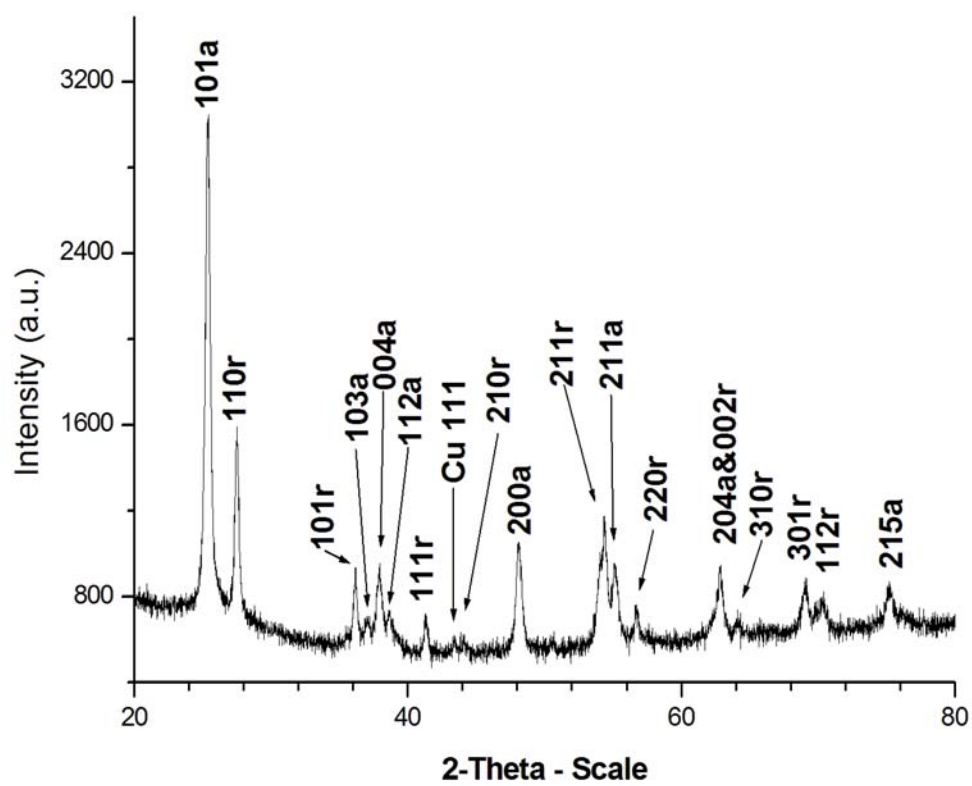

**Fig. S6**

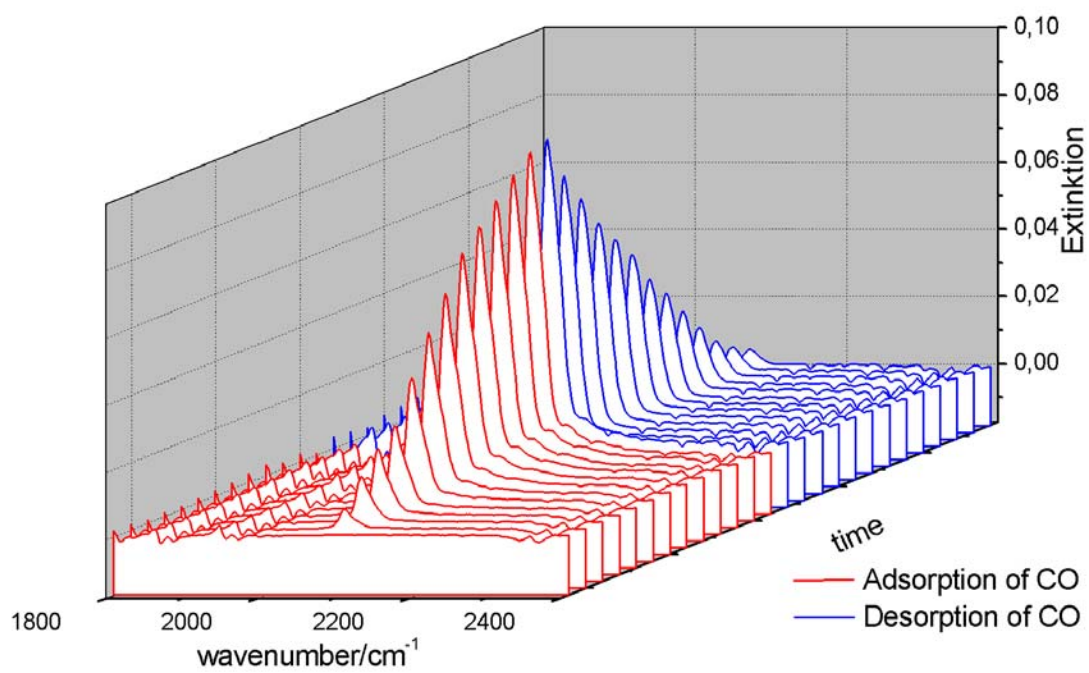

**Fig. S7**

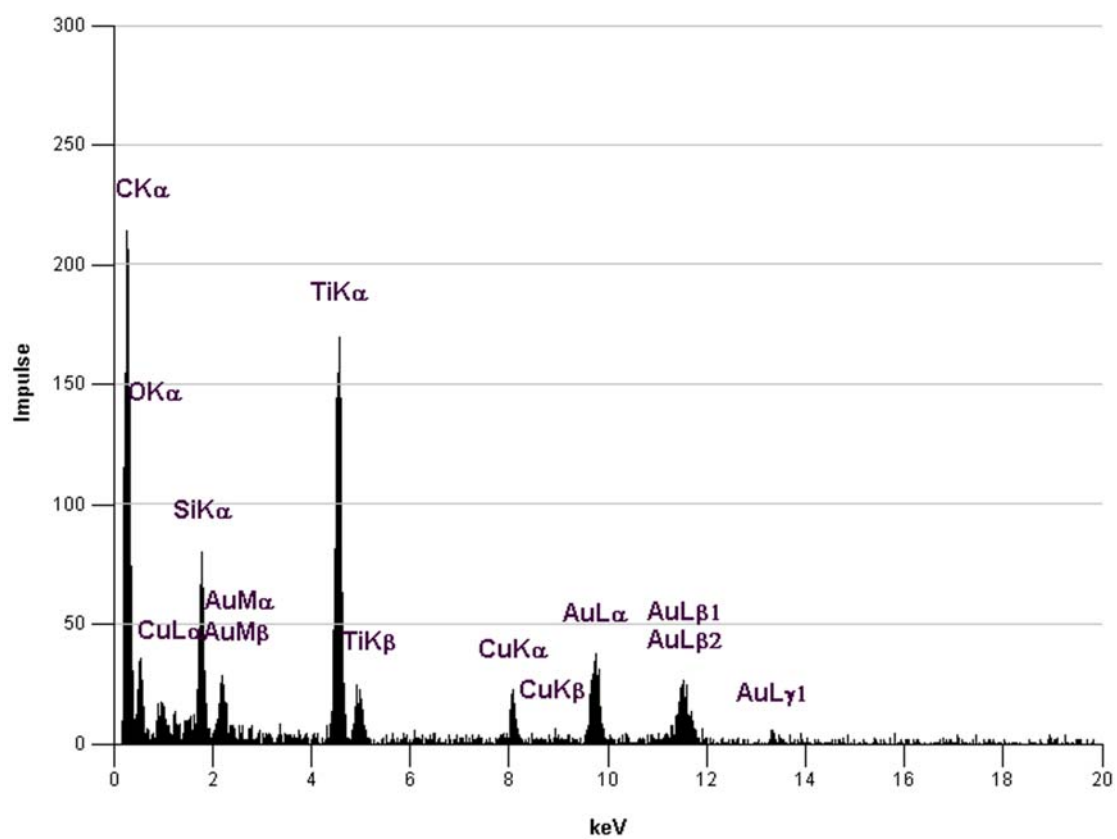

Supplement: b512113b.pdf [file b512113b.pdf]
